# Supplementary material
Source: PubMed Central journal article supplement (PMC5745528)

**A**

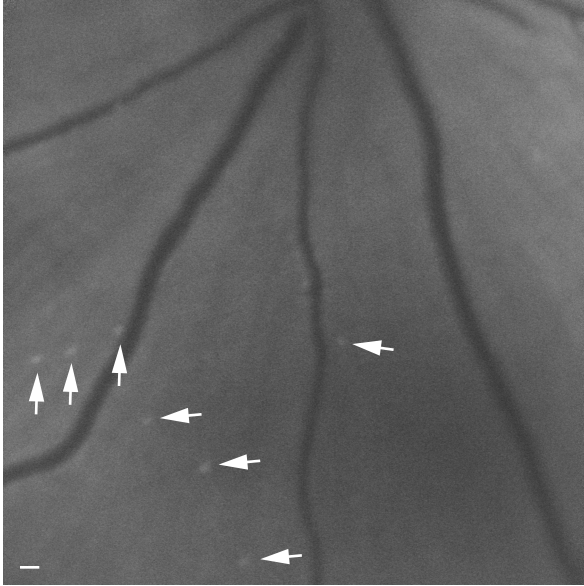

**B**

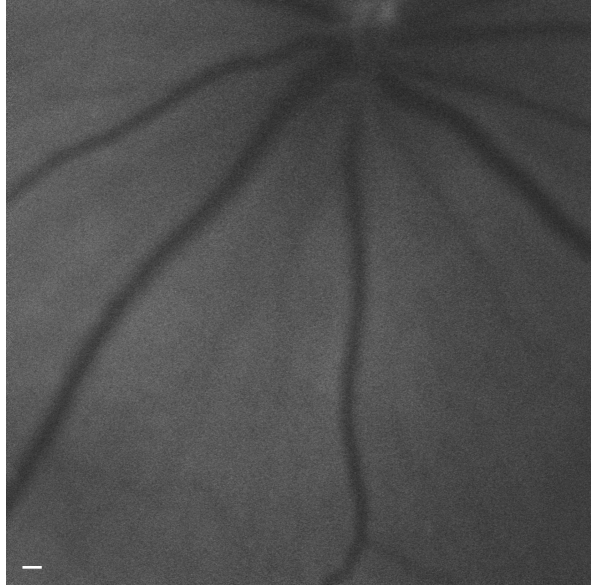

**Supplementary figure 1**

Supplement: mmc1.pdf [file mmc1.pdf]
